# Supplementary material for: Genome-wide identification of MYBL2 in Brassicaceae, with a focus on the expression pattern of regulating anthocyanin synthesis in Brassica crops
Source: Front Plant Sci. 2025 Jul 1;16:1629560. doi: 10.3389/fpls.2025.1629560 (PMC12259598; doi:10.3389/fpls.2025.1629560)
Supplement: Supplementary file 2 [file Table1.xlsx]

## Sheet: Sheet1
Table S1 qRT-PCR primer sequence
Primer name	Sequences
RTCHS-F	TCCTTGACGAGGTTGAGAAG
RTCHS-R	CAAGACCACTGTCTCTACG
RTCHI-F	GGAAAATTCGTGATCTTCACG
RTCHI-R	GAATACTGCTGTCCTGTTAAC
RTF3'H-F	TGCACGGATTTGAATGGGAACT
RTF3'H-R	GCTTGTCATGCAAGCTAAGTTAG
RTDFR-F	TGTTCGCGATCCTGGAAATTTGA
RTDFR-R	CTTTGATTCAAAATCCATGGGAGTA
RTANS-F	TGTTTTGTGAACCACCAAAGGAT
RTANS-R	CTCAAACATAGAGTTTCAGACTCA
UGT.A08-RT-F	AAGATCGGCTTTACCATCGTCG
UGT.A08-RT-R	TCTCCGAACTGGAACCGGAC
PAP1.A07.b-RT-F	AGCGAGAAAATGTCAACTCTCT
PAP1.A07.b-RT-R	CCACACAAACACACGGGTTC
MYBL2.A02-RT-F	GACGATGGTTGGTTGGGTCT
MYBL2.A02-RT-R	GATAGCGGGAAGGTTACCTGG
MYBL2.A07-RT-F	GGATCGATTCCCATTTTCATGAGT
MYBL2.A07-RT-R	ATGGTGCGCTTTCAGATGGT
MYBL2.C02-RT-F	AGTTTGAGTGATGGTAGAGACGA
MYBL2.C02-RT-R	CCTGGACGAACCGATACTGA
MYBL2.C06-RT-F	GGATCGATTCCCATTTTCATGAGTT
MYBL2.C06-RT-R	ATGGTACGCTTTCAGATGGTCA
TT8-RT-F	ATACCGTTATGGAAAGTGATC
TT8-RT-R	GTCTTTCTAGTCTTTATTGCG
Actin-F	TCCATCCATCGTCCACAG
Actin-R	GCATCATCACAAGCATCCTT
